# Supplementary material
Source: Frontiers journal article supplement (https://www.frontiersin.org/articles/521447)
Supplement: Data_Sheet_1.docx [file Data_Sheet_1.docx]

**Supplementary material to:**

“**Simultaneous measurements of denitrification and dinitrogen fixation in coral reef substrates: advantages and limitations of a combined acetylene assay**”

**SM 1: Incubation preparation, processing and gas concentration calculations**

Incubations and headspace sampling

Both acetylene (hereafter C2H2)-enriched seawater and C2H2 gas were prepared within 24 h prior to sample collection and incubations. For one gas bag (Tedlar 7”x7”, 1 L volume) and 1 L of filtered seawater, 12.5 g of calcium carbide (CaC2, Sigma-Aldrich, pieces, thickness < 10 mm) was added to 100 mL MilliQ filtered water in an Erlenmeyer flask. C2H2 gas was formed according to:

(1)

The gas was led through two consecutive 1 L Duran gas washing bottles; the first one filled with MilliQ water for filtration (Carpenter et al., 1987) and the second one with filtered seawater. The second bottle with filtered seawater was used in the incubation processes as it has been enriched with C2H2. Finally, the C2H2 was collected in a gas bag attached to the second Duran bottle (Fig. S2A). After producing C2H2 gas and C2H2-enriched seawater, specimens were prepared for the incubations. All preparations considered potential acclimatization phases in aquaria facilities after the sampling from the field or from fragmentation/cutting of the collected specimen to fit into the incubation chambers.

For the COBRA (=combined blockage/reduction assay), substrates/organisms were transferred to 1 L glass chambers with gastight seals and lids. The lids were equipped with a hole closed by a rubber septum (thickness: 10 mm) that was penetrated using a Luer Lock needle with a push-pull valve. This enabled sampling with a syringe whilst the chambers stayed airtight. Incubation chambers were filled with 720 mL of seawater that was collected in the field on the same day, and 80 mL C2H2-enriched seawater was added. Each incubation chamber contained a pedestal for the specimen, giving room to a magnetic stirrer. Seals and lids were placed on the incubation chambers and closed gastight. Using a syringe (50 mL PTFE Tipped Plunger and Dispenser Syringe, equipped with push-pull valve with Luer Lock, SGE Analytical Science), 20 mL of the headspace was substituted with 20 mL C2H2 gas. Thus both incubation water and headspace contained 10 % C2H2 (Fig. S2B). The incubation chambers were immersed in a tempered water bath that was placed on inductive drive stirrers (Variomag Telesystem, Thermo Scientific, Germany, 500 rpm) to ensure stable measurement conditions and constant water circulation within the chambers to promote an equilibrium between both liquid and gaseous stage (Flett et al., 1976). Gas samples (2.5 mL) were collected using a gastight syringe (2.5 mL PTFE Tipped Plunger and Dispenser Syringe, equipped with push-pull valve with Luer Lock, SGE Analytical Science) immediately after starting the incubation (t0) to correct for background C2H4 concentrations and the sample was transferred into a gastight vacuum tube (Monoject Blood Collection Tube 10.25 mm x 64 mm, 3 mL, Covidien).

Instrumentation and measurement of samples

The static headspace analysis was performed using either manual injection via a gastight syringe (1 mL Hamilton, equipped with push-pull valve with Luer Lock) or a headspace autosampler (Agilent G1888 Network Headspace Sampler). The headspace heated transfer line was connected to a capillary split-splitless inlet (inlet, in which the injected sample vaporizes and mixes with the carrier gas before a subset of the injected sample is transferred to the column) of an Agilent 7890B Gas Chromatograph (GC). The chromatographic separation was performed using the HP-Plot/Q column (19091P-QO4 with ID 0.32 mm, 30 m length, 20 µm film, Agilent technologies, Santa Clara, CA, USA) connected to the GC inlet and a helium pulsed discharge detector (VICI, Houston, TX, USA).

In case of the manual injection, a sample size of 1 mL was sampled and directly injected to the inlet of the GC using a gastight syringe (1 mL Hamilton, equipped with push-pull valve with Luer Lock). For the autosampler, a custom-built adapter was used to accommodate the Monoject blood collection vials. An auxiliary EPC (electron pressure control) module mounted on the GC was used for the vial pressurization. The GC raw data files were acquired and processed using Agilent Chemstation software. Peak identification was performed using a mass spectrometer that was attached to the GC (GC/MS system Agilent 7890A/5975, USA).

The headspace parameters were set as follows: the oven temperate was set at 50 °C with an oven stabilization time of 0.20 min; vial equilibration time was set at 1 min; vial pressurization time was set at 0.05 min; loop temperature was at set at 100 °C; loop equilibrium and fill time were set at 0.01 min and 0.05 min, respectively; vial pressure was set at 13.50 psi; GC cycle time was set at 15 min; temperature of the transfer line was set at 150 °C.

A HP-Plot/Q capillary column was used for the chromatographic separation of nitrous oxide (hereafter N2O) and ethylene (hereafter C2H4). The flow of helium as a carrier gas was set at a constant flow rate of 3.0 mL/min. The split-splitless inlet was held at 140 °C with a split ratio of 10:1. The initial column oven temperature was set at 36 °C and was held for 1 min, subsequently ramped to 76 °C for 4 min with a rate of 10 °C/min. The post-run temperature was set at 250 °C and was held for 3 min. In the GC/MS experimental phase for peak identification, the same GC parameters and column were used. The MS instrument parameters were set as follows: the temperature of the MS source and MS quad analyzer were set to 230 °C and 150 °C respectively, the scan range was from 20 to 50 Da and the electron energy was set at 70 eV. With these settings, peaks and retention times were identified. Prior to starting the measurements, a calibration of the GC system is required. For this purpose, the calibration curve should cover the expected ranges of C2H4 and N2O rates for reliable measurements.

Calculation of N2-fix and DENI rates

The measured headspace concentrations of C2H4 and N2O, respectively, were used to calculate the total dissolved amount of C2H4 and N2O in the incubation chamber. The total amount of C2H4 and N2O in the incubation chamber can be calculated via the addition of headspace and incubation water. These values can be used to approximate N2-fix and DENI rates (Haines et al., 1981; Wilson et al., 2012). The calculation process can be described as presented here for the measurement of C2H4 via manual injection (the calculation for N2O and injections via autosampler differ marginally, see end of this section).

The calculation of the absolute amount of C2H4 in the incubation chamber headspace (C2H4_HS; [nM]) can be described according to the following equation:

(2)

With:

*R*  ideal gas constant; defined as 24,465 cm3 mol-1 at 25 ˚C in our case as both gases act identical to ideal gases;

C2H4_ms measured headspace concentration [ppm]; possible equilibrium transformations (Boyle-Mariotte law, according to Job and Rüffler (2016)) have to be considered depending on the volume of the syringes used for sampling and transferring the gaseous sample from collection tube to the GC and the volume of the collection tube itself (see SM2);

*VolHS*headspace volume [cm3].

103 result of cancelations from unit-transformations for ppm to mol conversion

Accordingly, the total C2H4 amount in the incubation water (C2H4_IW; [nM]) was calculated according to:

(3)

With:

*β* Bunsen-solubility coefficient for C2H4 according to Breitbarth et al. (2004);

*VolIW* incubation water volume [mL].

The total C2H4 amount of the incubation chamber (C2H4_tot; [nM]) can be calculated with a simple addition as:

(4)

To ensure comparability between different specimens, rates should be normalized to either surface area (SA; e.g., by creating 3D models of the specimens with computer software) or dry weight (DW; Haines et al. 1981; Lavy et al. 2015; Gutierrez-Heredia et al. 2016). To calculate for metabolic background activities, rates of control incubations/seawater blanks have to be considered at this point too. In addition, rates should also be normalized to incubation time (e.g., rates per hour, rates per day, etc.). These two reference parameters (SA or DW, time) can be included according to the following equation, resulting in comparable rates between replicates (C2H4_rate; [nM time-1 SA-1 or nM time-1 g-1 DW]):

(5)

With:

C2H4_tot_smpl_tX C2H4_tot at tX;

C2H4_tot_smpl_t0 C2H4_tot at t0;

C2H4_tot_ctrl_tX  C2H4_tot of control incubation/seawater blank at tX;

C2H4_tot_ctrl_t0 C2H4_tot of control incubation/seawater blank at t0;

*RP* reference parameter (i.e., SA or DW).

A transformation from C2H4 evolution to N2-fix rates could be considered by using accurate conversion factors according to Mulholland et al. (2004) or Charpy-Roubaud et al. (2001).

The calculations for the total N2O concentration can be performed similarly to the approach presented before with the annotation of considering a different solubility factor *β* (Weiss and Price, 1980)and neglecting a conversion factor for N2O for the quantification of total DENI*.*

The calculation of both N2-fix and DENI via autosampler can be carried out as described above with the short annotation that the correction factors differ as the transfer from the vacuum tube immediately to the GC inlet happens (i.e., without the use of a syringe) and, therefore, no dilution effect appears.

**SM 2: Example of equilibrium transformations for syringes**

Possible equilibrium transformations have to be considered, depending on a) the volume of the syringes used for sampling and transferring the gaseous sample from the collection tube to the gas chromatograph (GC), and b) on the volume of the collection tube itself. In our setup, we used a 2.5 mL PTFE Tipped Plunger and Dispenser Syringe (SGE Analytical Science) equipped with a push-pull valve with a Luer Lock for sampling and transferring from the incubation chambers to the collection tube (3 mL), and a 1 mL gastight syringe (Hamilton) equipped with a push-pull valve with a Luer Lock for injecting samples to the GC. According to Boyle-Mariotte law, the following example demonstrates the transformations with the used syringe/collection tube volumes:

With:

C2H4ms ctd corrected C2H4 concentration [ppm]

C2H4ms measured C2H4 concentration [ppm]

CFa correction factor for the equilibrium in sample size and collection tube (here: 2.5 mL * (3 mL)-1)

CFb correction factor for the equilibrium in transferring the sample the GC (here: 4 mL * (3 mL)-1)

Identical calculations are used for the correction of measured N2O concentrations.

**Table S1:** Detailed list of equipment which is required to perform the presented method. If not indicated elsewhere, amount of products depends on the respective experimental design.

| Product | Amount |
| --- | --- |
| Agilent 7890A Gas Chromatograph System, Agilent Technologies | 1 |
| Agilent 5977A MSD, Agilent Technologies | 1 |
| HP-Plot/Q 19091P-QO4, Agilent J&W GC columns, length: 30m, I.D. 0,320mm, Film 20.00 um, Temp from -60°C to 270°C (290°C) | 1 |
| Helium pulsed discharge detector, VICI | 1 |
| Agilent G1888 Network Headspace Sampler, Agilent Technologies | 1 |
| Monoject Blood Collection Tube 10.25mm x 64mm, Covidien | 1 per sample |
| 2.5 mL PTFE Tipped Plunger and Dispenser Syringe, SGE Analytical Science, with push-pull valve with Luer Lock | 1 |
| 50 mL PTFE Tipped Plunger and Dispenser Syringe, SGE Analytical Science, with push-pull valve with Luer Lock | 1 |
| 1 mL Gastight syringe, Hamilton, with push-pull valve with Luer Lock | 1 |
| Tedlar Sampling Bag, 1 L, 7"x 7" | 1 |
| Calcium Carbide, pieces, thickness <10 mm, typically, technical grade, ~80% |  |
| Woulff’s bottle (incl. Duran bottles) | 2 |
| Erlenmeyer flask, 250 mL with a sidearm, lid | 1 |
| Connecting tubes |  |
| 1 L incubation chambers with gastight seals including rubber septum (>10 mm thickness) |  |
| Radion XR 15w Pro light system |  |
| Water bath, e.g. made of PVC |  |
| Variomag Telesystem, Thermo Scientific |  |

**Table S2:** Measured values of nitrous oxide (N2O) concentrations before surface area correction (nmol N2O mL-1) at respective time point (t0, t2, t4, t8, t12), and N2O concentrations corrected with seawater blank and related to surface area of respective specimens (nmol N2O cm-2). Asterisks indicate that initial (t0) N2O concentrations were lower than seawater blank concentrations (indicated with asterisks), value “zero” was used for rate calculation.

|  |  |  | nmol N2O mL-1 | | | | | nmol N2O cm-2 | | | | |
| --- | --- | --- | --- | --- | --- | --- | --- | --- | --- | --- | --- | --- |
|  | Substrate | Surface Area | t0 | t2 | t4 | t8 | t12 | t0 | t2 | t4 | t8 | t12 |
| **Dark** | Turf Algae I | 68 | 0.0133 | 0.0329 | 0.0440 | 0.0291 | 0.0449 | 0.0075 | 0.3439 | 0.4846 | 0.2479 | 0.4656 |
| Turf Algae II | 42 | 0.0111 | 0.0493 | 0.0384 | 0.0269 | 0.0274 | 0* | 0.9473 | 0.6530 | 0.3490 | 0.3376 |
| Turf Algae III | 39 | 0.0102 | 0.0399 | 0.0350 | 0.0241 | 0.0331 | 0* | 0.7804 | 0.6156 | 0.3030 | 0.5089 |
| Turf Algae IV | 68 | 0.0124 | 0.0323 | 0.0377 | 0.0268 | 0.0488 | 0* | 0.3352 | 0.3925 | 0.2133 | 0.5225 |
| Turf Algae V | 34 | 0.0138 | 0.0614 | 0.0706 | 0.0579 | 0.0588 | 0.0297 | 1.5263 | 1.7519 | 1.3436 | 1.3403 |
| **Light** | Turf Algae I | 50 | 0.0132 | 0.0252 | 0.0310 | 0.0333 | 0.0291 | 0* | 0.2765 | 0.3271 | 0.3757 | 0.2885 |
| Turf Algae II | 52 | 0.0113 | 0.0256 | 0.0289 | 0.0292 | 0.0354 | 0* | 0.2739 | 0.2735 | 0.2834 | 0.3974 |
| Turf Algae III | 33 | 0.0142 | 0.0142 | 0.0260 | 0.0364 | 0.0263 | 0.0000 | 0.0844 | 0.3446 | 0.6628 | 0.3525 |
| Turf Algae IV | 50 | 0.0122 | 0.0154 | 0.0282 | 0.0295 | 0.0274 | 0* | 0.0808 | 0.2701 | 0.2991 | 0.2537 |
| Turf Algae V | 64 | 0.0142 | 0.0258 | 0.0344 | 0.0214 | 0.0255 | 0.0000 | 0.2247 | 0.3091 | 0.1081 | 0.1683 |
| **Dark** | Coral Rubble I | 70 | 0.0142 | 0.0098 | 0.0148 | 0.0131 | 0.0199 | 0.0209 | 0.0036 | 0.0547 | 0.0124 | 0.0957 |
| Coral Rubble II | 48 | 0.0109 | 0.0148 | 0.0147 | 0.0199 | 0.0249 | 0* | 0.1102 | 0.0781 | 0.1585 | 0.2437 |
| Coral Rubble III | 67 | 0.0120 | 0.0141 | 0.0111 | 0.0177 | 0.0159 | 0* | 0.0692 | 0.0019 | 0.0815 | 0.0393 |
| Coral Rubble IV | 79 | 0.0136 | 0.0182 | 0.0120 | 0.0176 | 0.0251 | 0.0112 | 0.1104 | 0.0127 | 0.0679 | 0.1506 |
| **Light** | Coral Rubble I | 62 | 0.0153 | 0.0133 | 0.0276 | 0.0148 | 0.0171 | 0.0176 | 0.0305 | 0.2086 | 0.0049 | 0.0385 |
| Coral Rubble II | 39 | 0.0126 | 0.0140 | 0.0370 | 0.0174 | 0.0208 | 0* | 0.0664 | 0.5716 | 0.0744 | 0.1556 |
| Coral Rubble III | 43 | 0.0179 | 0.0134 | 0.0257 | 0.0194 | 0.0243 | 0.0866 | 0.0470 | 0.2555 | 0.1135 | 0.2240 |
| Coral Rubble IV | 68 | 0.0151 | 0.0142 | 0.0305 | 0.0227 | 0.0220 | 0.0137 | 0.0406 | 0.2328 | 0.1204 | 0.1071 |
| **Dark** | Seawater Blank |  | 0.0127 | 0.0095 | 0.0110 | 0.0123 | 0.0132 |  |  |  |  |  |
| **Light** | Seawater Blank |  | 0.0142 | 0.0114 | 0.0147 | 0.0145 | 0.0147 |  |  |  |  |  |

**Table S3:** Measured values of ethylene (C2H4) concentrations before surface area correction (nmol C2H4 mL-1) at respective time point (t0, t2, t4, t8, t12), and C2H4 concentrations corrected with seawater blank and related to surface area of respective specimens (nmol C2H4 cm-2).

|  |  |  | nmol C2H4 mL-1 | | | | | nmol C2H4 cm-2 | | | | |
| --- | --- | --- | --- | --- | --- | --- | --- | --- | --- | --- | --- | --- |
|  | Substrate | Surface Area | t0 | t2 | t4 | t8 | t12 | t0 | t2 | t4 | t8 | t12 |
| **Dark** | Turf Algae I | 68 | 0.0271 | 0.0566 | 0.0802 | 0.1553 | 0.2778 | 0.3978 | 0.4468 | 0.8093 | 1.9739 | 3.7496 |
| Turf Algae II | 42 | 0.0227 | 0.0600 | 0.0713 | 0.1047 | 0.1906 | 0.5404 | 0.8042 | 1.0996 | 1.9893 | 3.9957 |
| Turf Algae III | 39 | 0.0278 | 0.0730 | 0.0894 | 0.1805 | 0.5130 | 0.7127 | 1.2003 | 1.6492 | 4.0876 | 12.5683 |
| Turf Algae IV | 68 | 0.0212 | 0.0554 | 0.0712 | 0.0850 | 0.2109 | 0.3112 | 0.4297 | 0.6777 | 0.9398 | 2.7662 |
| Turf Algae V | 34 | 0.0208 | 0.0532 | 0.0788 | 0.1584 | 0.3033 | 0.6128 | 0.7941 | 1.5799 | 4.0380 | 8.2489 |
| **Light** | Turf Algae I | 50 | 0.0242 | 0.1186 | 0.4623 | 1.7398 | 3.1162 | 0.4844 | 1.9050 | 8.8386 | 34.3805 | 61.9032 |
| Turf Algae II | 52 | 0.0239 | 0.1219 | 0.4942 | 1.5807 | 2.8176 | 0.4603 | 1.8957 | 9.1115 | 29.9983 | 53.7790 |
| Turf Algae III | 33 | 0.0263 | 0.1230 | 0.4255 | 1.4745 | 2.3223 | 0.7966 | 3.0191 | 12.2765 | 44.0509 | 69.7348 |
| Turf Algae IV | 50 | 0.0217 | 0.0666 | 0.1385 | 0.5139 | 0.8055 | 0.4338 | 0.8656 | 2.3628 | 9.8622 | 15.6891 |
| Turf Algae V | 64 | 0.0222 | 0.1193 | 0.4528 | 1.5736 | 2.6606 | 0.3470 | 1.4998 | 6.7567 | 24.2616 | 41.2432 |
| **Dark** | Coral Rubble I | 70 | 0.0203 | 0.0407 | 0.1078 | 0.3370 | 0.7991 | 0.2900 | 0.2069 | 1.1806 | 4.5123 | 11.0900 |
| Coral Rubble II | 48 | 0.0232 | 0.0424 | 0.0832 | 0.2124 | 0.4289 | 0.4839 | 0.3381 | 1.2104 | 3.9840 | 8.4607 |
| Coral Rubble III | 67 | 0.0226 | 0.0370 | 0.0651 | 0.1716 | 0.3953 | 0.3378 | 0.1615 | 0.5971 | 2.2457 | 5.5596 |
| Coral Rubble IV | 79 | 0.0202 | 0.0431 | 0.0906 | 0.3509 | 0.7526 | 0.2551 | 0.2141 | 0.8287 | 4.1745 | 9.2379 |
| **Light** | Coral Rubble I | 62 | 0.0253 | 0.0955 | 0.4161 | 1.4480 | 3.1108 | 0.4076 | 1.1642 | 6.3833 | 23.0190 | 49.8350 |
| Coral Rubble II | 39 | 0.0212 | 0.0253 | 0.0931 | 0.3120 | 0.7245 | 0.5447 | 0.0512 | 1.8655 | 7.4674 | 18.0377 |
| Coral Rubble III | 43 | 0.0221 | 0.0629 | 0.2618 | 1.1644 | 2.6165 | 0.5131 | 0.9213 | 5.6151 | 26.5958 | 60.3590 |
| Coral Rubble IV | 68 | 0.0257 | 0.0558 | 0.2197 | 0.9207 | 1.7352 | 0.3773 | 0.4768 | 2.9319 | 13.2341 | 25.2072 |
| **Dark** | Seawater Blank |  | 0.0221 | 0.0262 | 0.0251 | 0.0211 | 0.0228 |  |  |  |  |  |
| **Light** | Seawater Blank |  | 0.0219 | 0.0233 | 0.0204 | 0.0208 | 0.0211 |  |  |  |  |  |

**Table S4:** Results from performed two-way analysis of variance (ANOVA) with factors “Time” and “Substrate” for both N2-fixation and denitrification (DENI) in respective incubation environments (dark or light, respectively). Significant p-values in bold.

|  |  | Factor | |
| --- | --- | --- | --- |
|  |  | Time | Substrate |
| Process & Incubation Environment | Dark – N2-Fixation | F = 28.670; **p < 0.001** | F = 0.0795; p = 0.379 |
| Light – N2-Fixation | F = 26.849; **p < 0.001** | F = 2.750; p = 0.106 |
| Dark – DENI | F = 2.836; **p = 0.039** | F = 21.137; **p < 0.001** |
| Light – DENI | F = 18.238; **p < 0.001** | F = 7.313; **p < 0.010** |

**Table S5**: P-values for comparisons within the factor “substrate” (i.e., coral rubble vs. turf algae) at samplings t0, t2, t4, t8 and t12 for both N2-fixation and denitrification (DENI) in respective incubation environment (dark and light, respectively). Significant p-values in bold.

|  | t0 | t2 | t4 | t8 | t12 |
| --- | --- | --- | --- | --- | --- |
| Dark – N2-Fixation | 0.664 | 0.652 | 0.852 | 0.318 | 0.441 |
| Light – N2-Fixation | 0.946 | 0.869 | 0.604 | 0.133 | 0.164 |
| Dark – DENI | 0.633 | **0.003** | **0.002** | **0.033** | **0.027** |
| Light – DENI | 0.334 | **0.041** | 0.881 | **0.048** | **< 0.001** |


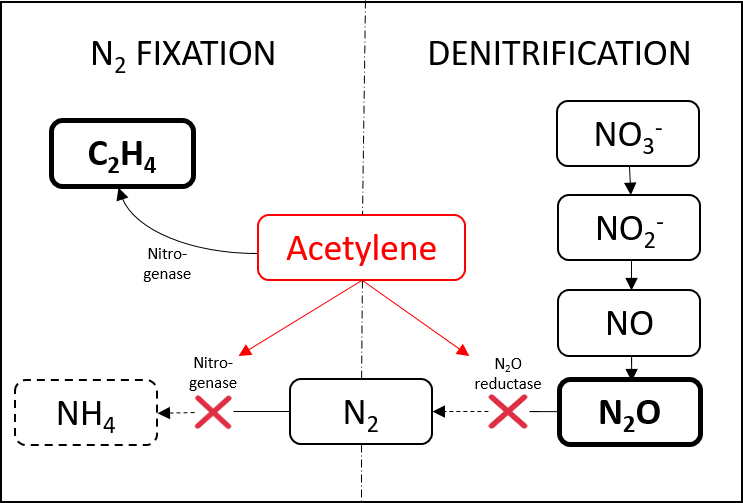


**Figure S1:** **Effect of acetylene on N2-fixation and denitrification**; red X on the left symbolizes a disruption of N2-fixation in the presence of acetylene, resulting in an accumulation of ethylene (C2H4) via the enzyme nitrogenase. Acetylene inhibits (red X on the right) the last step of denitrification (i.e., nitrous oxide reductase of denitrifying bacteria), resulting in an accumulation of nitrous oxide; dashed arrows symbolize the theoretical pathways/formation in an acetylene-free environment. NO3- = nitrate, NO2- = nitrite, NO = nitric oxide, N2O = nitrous oxide, N2 = atmospheric dinitrogen, NH4 = ammonium.

**
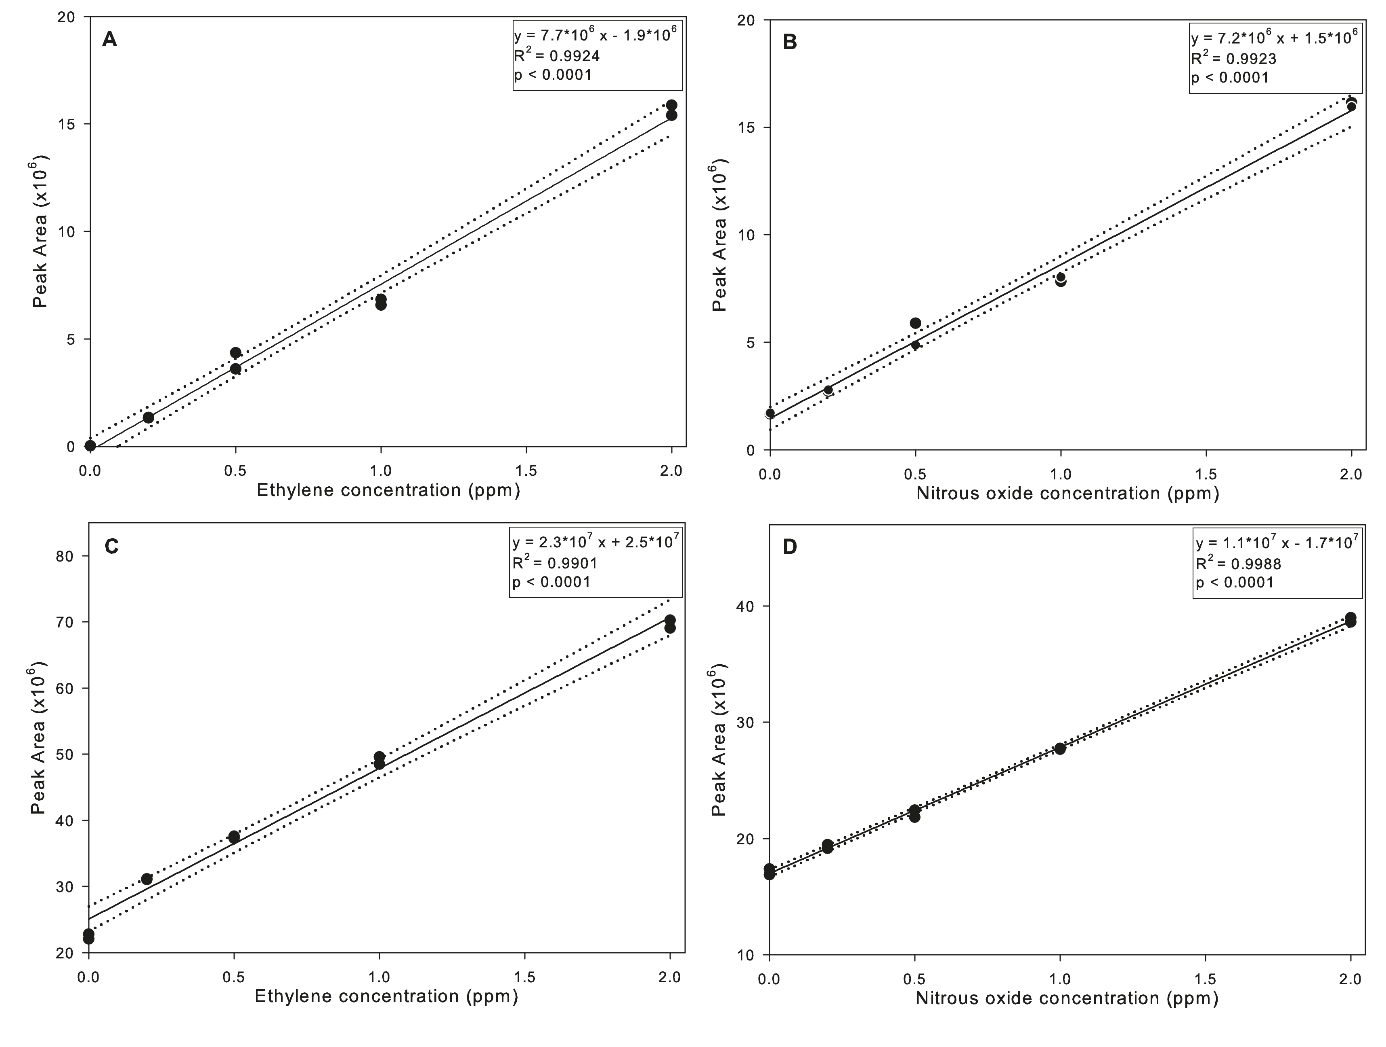
**

**Figure S2:** **Calibration curves** measured via manual injection for ethylene (A) and nitrous oxide (B) and via autosampler for ethylene (C) and nitrous oxide (D); black dots = measured values; black line = regression line; dotted line = 95 %-confidence interval.

**
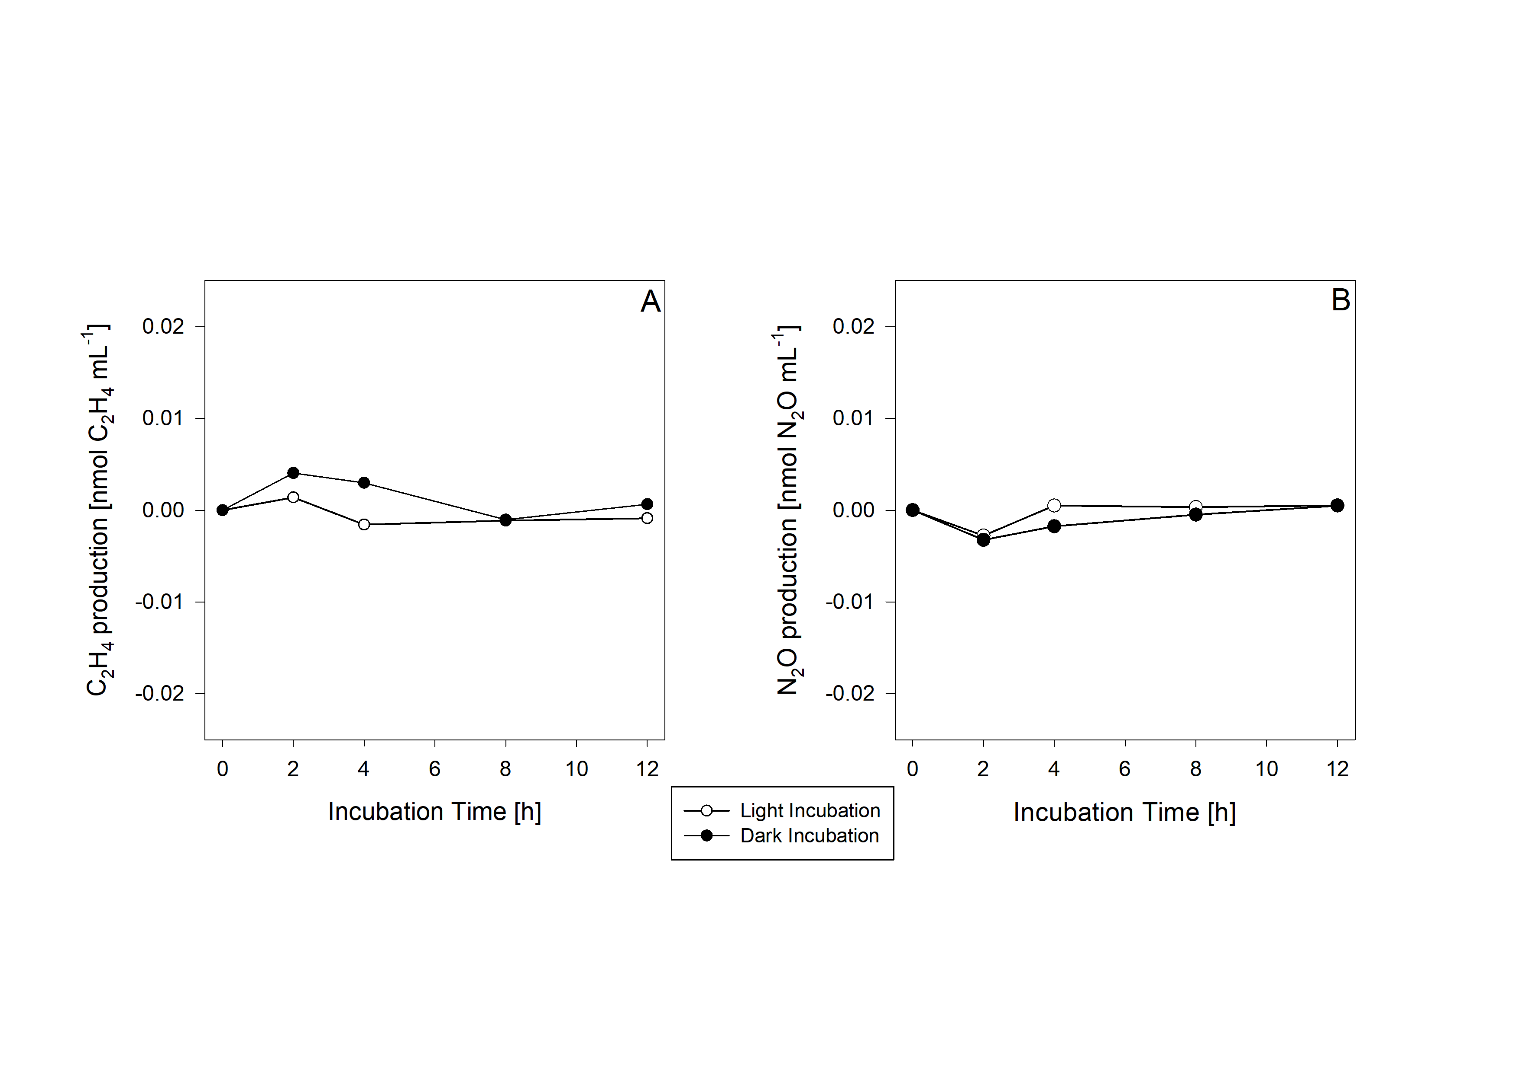
**

**Figure S3: Ethylene (C2H4; A) and nitrous oxide (N2O; B) production** in both dark and light seawater blank incubation chambers (n = 1) over the whole incubation time of 12 h with samplings at t0, t2, t4, t8 and t12.

**References**

Breitbarth, E., Mills, M. M., Friedrichs, G., and Laroche, J. (2004). The Bunsen gas solubility coefficient of ethylene as a function of temperature and salinity and its importance for nitrogen fixation assays. *Limnol. Oceanogr. Methods* 2, 282–288. doi:10.4319/lom.2004.2.282.

Carpenter, E. J., Scranton, M. I., Novelli, P. C., and Michaels, A. (1987). Validity of N2fixation rate measurements in marine Oscillatoria (Trichodesmium). *J. Plankton Res.* 9, 1047–1056. doi:10.1093/plankt/9.6.1047.

Charpy-Roubaud, C., Charpy, L., and Larkum, A. (2001). Atmospheric dinitrogen fixation by benthic communities of Tikehau lagoon (Tuamotu Archipelago, French Polynesia) and its contribution to benthic primary production. *Mar. Biol.* 139, 991–997. doi:10.1007/s002270100636.

Flett, R. J., Hamilton, R. D., and Campbell, N. E. R. (1976). Aquatic acetylene-reduction techniques: solutions to several problems. *Can. J. Microbiol.* 22, 43–51. doi:10.1139/m76-006.

Gutierrez-Heredia, L., Benzoni, F., Murphy, E., and Reynaud, E. G. (2016). End to End Digitisation and Analysis of Three-Dimensional Coral Models, from Communities to Corallites. *PLoS One* 11, e0149641. doi:10.1371/journal.pone.0149641.

Haines, J. R., Atlas, R. M., Griffiths, R. P., and Morita, R. Y. (1981). Denitrification and Nitrogen Fixation in Alaskan Continental Shelf Sediments. *Appl. Environ. Microbiol.* 41, 412–421.

Job, G., and Rüffler, R. (2016). “Molecular-Kinetic View of Dilute Gases,” in *Physical Chemistry from a Different Angle* (Springer, Cham), 271–294. doi:10.1007/978-3-319-15666-8.

Lavy, A., Eyal, G., Neal, B., Keren, R., Loya, Y., and Ilan, M. (2015). A quick, easy and non-intrusive method for underwater volume and surface area evaluation of benthic organisms by 3D computer modelling. *Methods Ecol. Evol.* 6, 521–531. doi:10.1111/2041-210x.12331.

Mulholland, M. R., Bronk, D. A., and Capone, D. G. (2004). Dinitrogen fixation and release of ammonium and dissolved organic nitrogen by Trichodesmium IMS101. *Aquat. Microb. Ecol.* 37, 85–94. doi:10.3354/ame037085.

Pogoreutz, C., Rädecker, N., Cárdenas, A., Gärdes, A., Wild, C., and Voolstra, C. R. (2017). Nitrogen fixation aligns with nifH abundance and expression in two coral trophic functional groups. *Front. Microbiol.* 8, 1–7. doi:10.3389/fmicb.2017.01187.

Weiss, R. F., and Price, B. A. (1980). Nitrous Oxide Solubility in Water and Seawater. *Mar. Chem.* 8, 347–359. doi:10.1016/0304-4203(80)90024-9.

Wilson, S. T., Böttjer, D., Church, M. J., and Karl, D. M. (2012). Comparative assessment of nitrogen fixation methodologies, conducted in the oligotrophic north pacific ocean. *Appl. Environ. Microbiol.* 78, 6516–6523. doi:10.1128/AEM.01146-12.
